# Supplementary material for: Genetic Screen in Chlamydia muridarum Reveals Role for an Interferon-Induced Host Cell Death Program in Antimicrobial Inclusion Rupture
Source: PubMed Central journal article supplement (PMC6456753; doi:10.1128/mbio.00385-19), 2019-04-09

A.

|        | CM | Igs4 | R3 | R5 | R7 |
|--------|----|------|----|----|----|
| TC0094 | S  | F    | S  | F  | F  |
| TC0157 | V  | A    | V  | A  | A  |
| TC0431 | D  | N    | D  | N  | N  |
| TC0433 | S  | F    | S  | F  | F  |
| TC0462 | S  | N    | S  | N  | N  |
| TC0574 | G  | E    | G  | G  | G  |
| TC0610 | G  | E    | G  | E  | G  |
| TC0741 | M  | I    | I  | I  | I  |
| TC0769 | S  | F    | F  | F  | F  |

B.

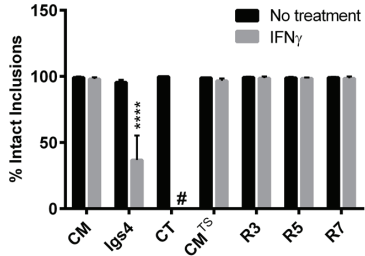

C.

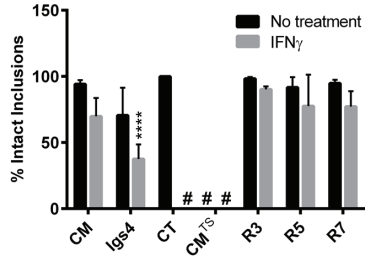

Supplement: mBio.00385-19-sf002.pdf [file mBio.00385-19-sf002.pdf]
