# Supplementary material for: Genetic Screen in Chlamydia muridarum Reveals Role for an Interferon-Induced Host Cell Death Program in Antimicrobial Inclusion Rupture
Source: PubMed Central journal article supplement (PMC6456753; doi:10.1128/mbio.00385-19), 2019-04-09
Supplement: mBio.00385-19-sf003.pdf [file mBio.00385-19-sf003.pdf]

A.

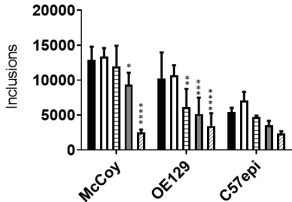

B.

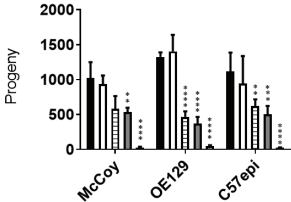

Control
  CHX
  IFN $\beta$  (20u)
  IFN $\beta$  (200u)
  IFN $\gamma$
