# Supplementary material for: Genetic Screen in Chlamydia muridarum Reveals Role for an Interferon-Induced Host Cell Death Program in Antimicrobial Inclusion Rupture
Source: PubMed Central journal article supplement (PMC6456753; doi:10.1128/mbio.00385-19), 2019-04-09

A.

TNF $\alpha$  + ZVADTNF $\alpha$  + ZVAD  
+ necrostatin-1

DMSO

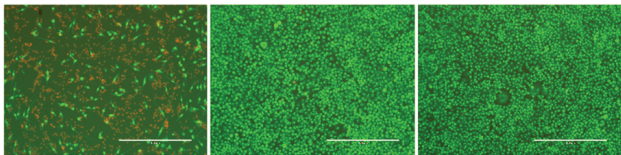

B.

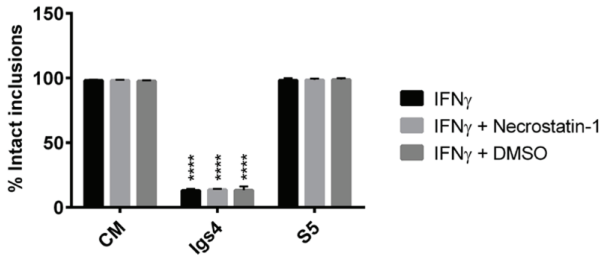

Supplement: mBio.00385-19-sf004.pdf [file mBio.00385-19-sf004.pdf]
