# Supplementary material for: Genetic Screen in Chlamydia muridarum Reveals Role for an Interferon-Induced Host Cell Death Program in Antimicrobial Inclusion Rupture
Source: PubMed Central journal article supplement (PMC6456753; doi:10.1128/mbio.00385-19), 2019-04-09
Supplement: mBio.00385-19-sf005.pdf [file mBio.00385-19-sf005.pdf]

CM

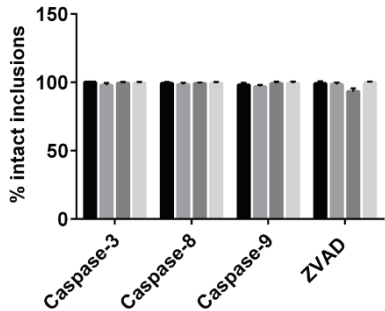

Igs4

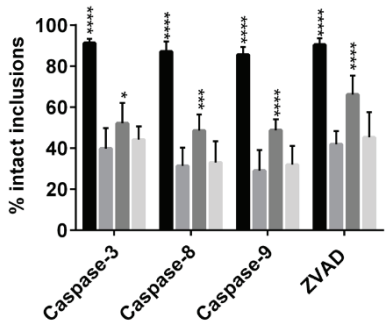

S5

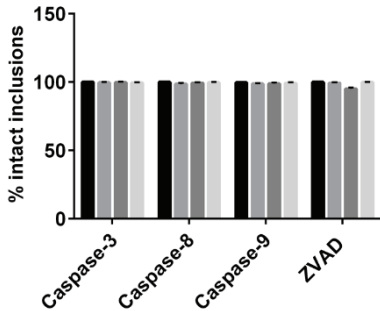

■ No treatment

■ IFN $\gamma$ ■ IFN $\gamma$  + 100 $\mu$ M■ IFN $\gamma$  + DMSO
