# Supplementary material for: Genetic Screen in Chlamydia muridarum Reveals Role for an Interferon-Induced Host Cell Death Program in Antimicrobial Inclusion Rupture
Source: PubMed Central journal article supplement (PMC6456753; doi:10.1128/mbio.00385-19), 2019-04-09
Supplement: mBio.00385-19-sf007.pdf [file mBio.00385-19-sf007.pdf]

A.

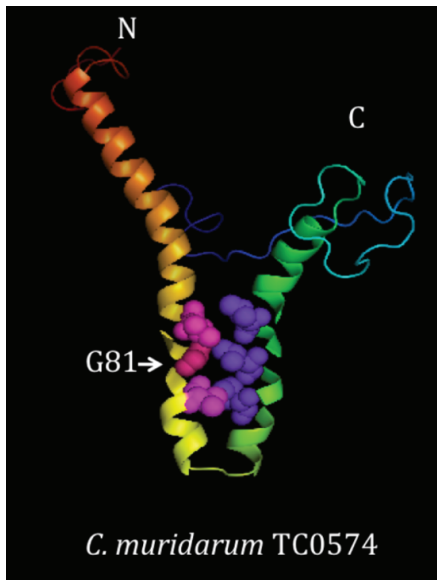

B.

|           |                                                                                   |     |
|-----------|-----------------------------------------------------------------------------------|-----|
| <i>Cm</i> | MGNAFNPNPFIFRDINMNNIT--LSASSSSLNSEPDRPQ-EKVNPHLLFIALIPVIGLGVALYLCIK               | 64  |
| <i>Ct</i> | -----MCYVLNFITGKYSTPSPNNCRPQSPQKTGGHSNLLFVLALLPVIGLGVAIYLCAR                      | 55  |
| <i>Cs</i> | -----MTQLISSTSSSSSVPHSEPFYPP-SKPHSSLLFVLAQLPI IGLAVACYLCVQ                        | 51  |
|           | : : :        : : *    . . . *    *        .    *** : ** : * : *** . **    * * : : |     |
|           |                                                                                   |     |
| <i>Cm</i> | TTDVHWKSNAGVAVLGGLGILAIAYILIQTLLVIRL---AFKKINNFLHHPTLPCCISFSCCKTKTE               | 127 |
| <i>Ct</i> | R-ANYWKGNAAIATAGGLGLITIAAALMVVITPIIFCLRY---LYQLLRQLPAHCCGSSHQIEI--                | 115 |
| <i>Cs</i> | R-GPHWKSAGVAIAGGLGLTAFAAVLIYTLGYAFMGIFYAIGLVAKNIHQGRASSCRNPFLVEQ---               | 114 |
|           | : ** . . . : *    *** : : *    * : : :        :        : : : : :                  |     |
